# Supplementary material
Source: HighWire-hosted journal article supplement (https://bmjopen.bmj.com/content/15/4/e092775)
Supplement: inline-supplementary-material-4 [file inline-supplementary-material-4.pdf]

Summary of the characteristics of included trials

| Study author; country              | Sample (n); % female; mean age | Exercise components                                                       | Duration; session length; frequency | Setting; exercise mode                                 | Comparator                | Video exercise; media; device                                                                     | Physical performance measurements                                                                                                               | Fall-related outcomes and measurements                                    |
|------------------------------------|--------------------------------|---------------------------------------------------------------------------|-------------------------------------|--------------------------------------------------------|---------------------------|---------------------------------------------------------------------------------------------------|-------------------------------------------------------------------------------------------------------------------------------------------------|---------------------------------------------------------------------------|
| Boongird et al (2017); Thailand    | 417; 86.6%; 74.08              | Lower extremity strengthening, stretching, and balance training.          | 6 months; 60 min; 2-3x week         | Home; individual; supervised                           | Non-exercise intervention | Entirely video; offline; Video Disk Recorder (VDR)                                                | Strength (5-STs); Dynamic balance (TUG, BBS)                                                                                                    | Fear of falling (Thai FES-I); Number of falls and fallers (self-recorded) |
| Caballer et al (2016); Spain       | 51; 69%; 69.1±4                | Lower extremity strengthening, balance, mobility, flexibility, endurance. | 4 months; 45 min; 3x week           | Centre; group; supervised                              | No intervention           | Entirely video; offline; DVD player                                                               | Mobility (TUG); Functional balance (BBS); Balance (OLS); Aerobic endurance (6MWT); Lower limb function (SPPB); Lower extremity strength (5-STs) | Not assessed                                                              |
| Chang et al (2023); Taiwan         | 167; 70.1%; 67.6±7.86          | Resistance, static balance, dynamic balance, speed-walking.               | 4 months; 60 min; 2-3x week         | Centre and home; both group and individual; supervised | Non-exercise intervention | Partially video (combined with face-to-face exercise); online; smartphone & LINE chat application | Upper limb strength (Grip strength); SPPB; static balance ability (OLS); physical agility (TUG); dynamic balance ability (functional reach)     | Not assessed                                                              |
| Fyfe et al (2022); Australia       | 19; 67%; 69.8±3                | Lower extremity strengthening, balance, functional tasks                  | 1 month; 9 min; 3x day              | Home; individual; unsupervised                         | No intervention           | Entirely video; online; smartphone/tablet & website platform                                      | Physical function (5-STs and 30s CST)                                                                                                           | Not assessed                                                              |
| Haines et al (2009); Australia     | 50; 60.4%; 80.9±6.5            | Muscle strength, balance                                                  | 2 months; 13 min                    | Home; individual; supervised                           | No intervention           | Entirely video; offline; DVD player                                                               | Balance (BOOMER); Strength (15s sit-to-stand); Mobility (2-minute walk test)                                                                    | Fear of falling (ABC Scale); Number of falls (self-recorded)              |
| Liang et al (2020); United Kingdom | 30; 67%; 71.1±3.6              | Functional tasks, muscle strength, balance, tai chi                       | 1 month; 2x day                     | Home; individual; unsupervised                         | Non-exercise intervention | Entirely video; online; smartphone/tablet and website platform                                    | Physical function (5-STs, 60s sit-to-stand, Leg standing balance)                                                                               | Not assessed                                                              |
| Lytras et al (2022); Greece        | 150; 90.7%; 70                 | Lower extremity strengthening, balance, flexibility                       | 6 months; 45 min; 5x week           | Centre and home; both group and individual; supervised | Non-exercise intervention | Partially video (combined with face-to-face exercise); offline; TV or computer                    | Functional mobility (TUG); Static balance (4-stage balance); Leg strength (30s CST); Balance (BBS)                                              | Fear of falling (short FES-I); Number of falls (self-recorded)            |

Continued

| Study author; country                | Sample (n); % female; mean age | Exercise components                                                      | Duration; session length; frequency | Setting; exercise mode         | Comparator                | Video exercise; media; device                                          | Physical performance measurements                                                                                                        | Fall-related outcomes and measurements     |
|--------------------------------------|--------------------------------|--------------------------------------------------------------------------|-------------------------------------|--------------------------------|---------------------------|------------------------------------------------------------------------|------------------------------------------------------------------------------------------------------------------------------------------|--------------------------------------------|
| McAuley et al (2012); United States  | 260; 71.52%; 70.62±0.4         | Muscle strength, balance, and flexibility.                               | 6 months; 3x week                   | Home; individual; unsupervised | Non-exercise intervention | Entirely video; offline; DVD player                                    | Functional performance (SPPB)                                                                                                            | Not assessed                               |
| Meziere et al (2021); France         | 35; 83.3%; 90                  | Muscle strength, balance, functional tasks, joint mobilization exercises | 3 months; 2x week                   | Home; individual; supervised   | Non-exercise intervention | Partially video (combined with face-to-face exercise); offline; tablet | Walking and balance ability (TUG)                                                                                                        | Absence of falls requiring medical care    |
| Roberts et al (2017); United States  | 153; 73.6%; 70±4.98            | Muscle strength, balance, and flexibility.                               | 24 months follow up; 3x week        | Home; individual; unsupervised | Non-exercise intervention | Entirely video; offline; DVD player                                    | Functional performance (SPPB)                                                                                                            | Not assessed                               |
| Vestergaard et al (2007); Denmark    | 53; 100%; 81±3.3               | Muscle strength, balance, flexibility, and endurance                     | 5 months; 26 min; 3x week           | Home; individual; unsupervised | No intervention           | Entirely video; offline; Video player                                  | Functional ability (5-STs, 10-meter walking, standing balance test, PPT, Mob-T)                                                          | Not assessed                               |
| Wojcicki et al (2015); United States | 237; 71.5%; 70.6±0.4           | Muscle strength, balance, and flexibility.                               | 12 months follow up; 3x week        | Home; individual; unsupervised | Non-exercise intervention | Entirely video; offline; DVD player                                    | Functional performance (SPPB)                                                                                                            | Not assessed                               |
| Yamada et al (2011); Japan           | 84; 80.5%; 83±6.7              | Muscle strength, balance, agility, and dual tasks.                       | 6 months; 20 min; 2x week           | Centre; group; supervised      | No intervention           | Entirely video; offline; DVD player                                    | Functional fitness (TUG, 5-STs)                                                                                                          | Not assessed                               |
| Suzuki et al (2024); Japan           | 15; 33.3%                      | Slow squats, one-legged stance                                           | 3 months; 15 min; daily             | Home; individual; supervised   | No intervention           | Entirely video; online; smartphone & YouTube application               | Muscle strength (Grip strength, knee extension strength); Balance capability (One-leg standing time with eyes open and with eyes closed) | Not assessed                               |
| Ferrari et al (2024); Italy          | 73; 49%; 66.89±5.9             | Muscle strength and balance                                              | 6 months; 30 min; 3x week           | Home; individual; supervised   | No intervention           | Entirely video; online; tablet & website platform                      | Balance (semi-tandem); Gait (10-meter walking)                                                                                           | Not assessed                               |
| Zhou et al (2025); China             | 116; 25%; 84.4±3.2             | Muscle strength and balance                                              | 12 months; 30 min; 3x week          | Home; individual; supervised   | No intervention           | Entirely video; online; smartphone & WeChat application                | Grip strength; Usual gait speed; 5-STs; TUG                                                                                              | Rate of new falls: Fear of falling (FES-I) |
